# Supplementary material
Source: Springer Nature journal article supplement (https://www.springermedizin.de/resource/supplementary/13075_2004_1362_MOESM8_ESM.pdf/9689606)

relative cell number

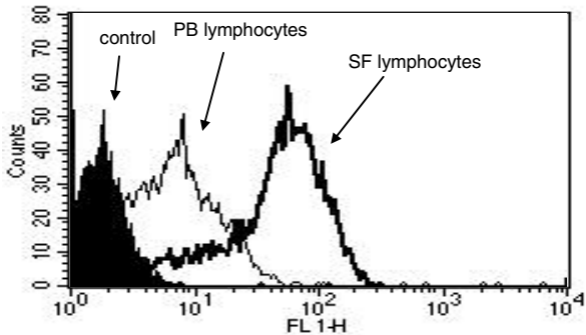

log. fluorescence intensity

Supplement: MOESM8 [file 9689606]
